# Supplementary material
Source: PubMed Central journal article supplement (PMC11467843)
Supplement: NIHMS1613421-supplement-Supplement.pdf [file NIHMS1613421-supplement-Supplement.pdf]

# Tunable titanium metal-organic frameworks with infinite Ti-O rod for highly efficient visible-light-driven photocatalytic H<sub>2</sub> evolution

Changqing Li,<sup>a‡</sup> Hui Xu,<sup>b‡</sup> Junkuo Gao,<sup>a,c\*</sup> Wenna Du,<sup>d</sup> Liqing Shangguan,<sup>a</sup> Xin Zhang,<sup>c</sup> Rui-Biao Lin,<sup>c</sup> Hui Wu,<sup>e</sup> Wei Zhou,<sup>e</sup> Xinfeng Liu,<sup>d\*</sup> Juming Yao,<sup>a</sup> Banglin Chen<sup>c\*</sup>

<sup>a</sup>Institute of Fiber based New Energy Materials, The Key Laboratory of Advanced Textile Materials and Manufacturing Technology of Ministry of Education, College of Materials and Textiles, Zhejiang Sci-Tech University, Hangzhou 310018, P. R. China

<sup>b</sup>College of Materials Science and Engineering, China Jiliang University, Hangzhou 310018, PR China

<sup>c</sup>Department of Chemistry, University of Texas at San Antonio, One UTSA Circle, San Antonio, Texas 78249-0698, United States

<sup>d</sup>Division of Nanophotonics, CAS Key Laboratory of Standardization and Measurement for Nanotechnology, CAS Center for Excellence in Nanoscience, National Center for Nanoscience and Technology, Beijing 100190, China

<sup>e</sup>NIST Center for Neutron Research, National Institute of Standards and Technology, Gaithersburg, Maryland 20899-6102, United States

## 1. Experimental Details

### Experimental Section

**Materials.** All chemicals were purchased from Alfa Aesar, TCI chemical and Aldrich and used without further purification. Extra dry DMF packaged with molecular sieves was obtained from Alfa Aesar. Organic ligands H<sub>3</sub>TCA<sup>[1]</sup>, H<sub>3</sub>BTB<sup>[2]</sup> and H<sub>3</sub>BTCA<sup>[3]</sup> were synthesized according to literatures.

### Characterization.

Powder X-ray diffraction data (XRD) were recorded on a Bruker D8 Advance diffractometer with a graphite-monochromatized Cu *K* $\alpha$  radiation. FTIR spectra were recorded from KBr pellets by using a Perkin Elmer FTIR SpectrumGX spectrometer. Thermogravimetric analysis (TGA) was carried out on a TA Instrument Q500 Thermogravimetric Analyzer at a heating rate of 10 °C/min

up to 1000 °C under N<sub>2</sub> atmosphere and air atmosphere. UV-Vis absorption spectra were obtained using a Shimadzu UV-2450 spectrophotometer. The optical diffuse reflectance spectra were measured on a Hitachi UH-4150 UV-vis spectrometer equipped with an integrating sphere. BaSO<sub>4</sub> was used as the reference material, and the polycrystalline samples were ground well before the measurement. The absorption ( $\alpha/S$ ) data were calculated from the reflectance using the Kubelka–Munk function:  $\alpha/S = (1-R)^2/2R$ , in which R is the reflectance at a given wavelength,  $\alpha$  is the absorption coefficient, and S is the scattering coefficient. X-ray photoelectron spectroscopy (XPS) data were obtained with a Thermal Fisher Scientific K-Alpha electron spectrometer. field Emission scanning electron microscope (SEM) image were obtained by Carl Zeiss Ultra55 microscope and transmission electron microscopy (TEM) image were obtained by JEM-2100. The specific surface areas of all samples were measured by the Brunauer-Emmett-Teller (BET) method. The N<sub>2</sub> adsorption-desorption isotherms at 77 K were measured on a Micrometrics ASAP 2020 system to evaluate their pore structures. All the samples were degassed at 160 °C for 2 hours before the surface area measurements. Simulation of the XRD pattern was carried out by the crystal data and diffraction-crystal module of the Mercury (Hg) program version 3.1 available free of charge via the Internet <http://www.ccdc.cam.ac.uk>.

### **Synthesis of ZSTU-1**

4,4',4''-nitriлотribenzoicacid (H<sub>3</sub>TCA) (377 mg, 1 mmol) was added to 5 mL of extra dry DMF in a 25 mL Teflon-lined stainless-steel autoclave. After ultrasound for 1 h to obtain clear solution, titanium isopropoxide (0.31 mL, 1 mmol) was added dropwise with stirring and a bright yellow slurry formed. The mixture was heated at 180 °C for 24 h in an oven. Then, the mixture was naturally cooled to room temperature and washed with DMF and methanol three times each. Bright yellow crystalline powder was obtained. Yield: 40 % (based on Ti).

### **Synthesis of ZSTU-2**

1,3,5-Tri (4-carboxyphenyl) benzene (H<sub>3</sub>BTB) (500 mg, 1.14 mmol) was added to 5 mL of extra dry DMF in a 25 mL Teflon-lined stainless-steel autoclave. After ultrasound for 1 h to obtain clear solution, titanium isopropoxide (0.2 mL, 0.64 mmol) was added dropwise with stirring and a white slurry formed. The mixture was heated at 180 °C for 30 h in an oven. Then, the mixture was naturally cooled to room temperature and washed with DMF and methanol three times each. White crystalline powder was obtained. Yield: 30 % (based on Ti). For activation of **ZSTU-2**, the powders were

heated with DMF at 120 °C for eight hours to remove any organic ligands, and reflux with methanol at 80 °C for eight hours to remove DMF, then dried in a vacuum oven at 60 °C for 12 hours.

### **Synthesis of ZSTU-3**

4',4''',4''''-nitriлотris((1,1'-biphenyl)-4-carboxylic acid) (H<sub>3</sub>BTCA) (400 mg, 0.66 mmol) was added to 5 mL of extra dry DMF in a 25 mL Teflon-lined stainless-steel autoclave. After ultrasound for 1 h to obtain clear solution, titanium isopropoxide (0.16 mL, 0.5 mmol) was added dropwise with stirring and a yellow slurry formed. The mixture was heated at 180 °C for 30 h in an oven. Then, the mixture was naturally cooled to room temperature and washed with DMF and methanol three times each. Yellow powder was obtained. Yield: 30 % (based on Ti). For activation of **ZSTU-3**, the powders were heated with DMF at 120 °C for eight hours to remove any organic ligands, and reflux with methanol at 80 °C for eight hours to remove DMF, then dried in a vacuum oven at 60 °C for 12 hours.

**Electrode preparation.** To prepare the photoelectrodes, 10 mg of **ZSTU-1** was first ground using a marble mortar and pestle, and then added into 1 mL of 98% ethanol (Merck). The as-prepared solution was placed on a 60°C hotplate stirrer overnight to ensure that the **ZSTU-1** was completely dissolved in the solution. Meanwhile, the fluorine-doped tin oxide (F:SnO<sub>2</sub>, Tec 15, 10Ω/□, Hartford Glass Company) were cleaned thoroughly by sonication in 5% detergent for 30 min first and then rinsed with de-ionized water (DI water) for several times, which were followed by sonication in DI water for 15 min. The sonication in DI water process was repeated for three times. Before coating with **ZSTU-1**, the FTO substrates were cleaned with UV-ozone plasma for 15 min to remove the organic residues. After that, 10 μl of the 10 mg/ml **ZSTU-1** solution was dropped onto the surface of FTO substrate, which was masked by a 3M scotch tape with an exposed area of 1.0 × 1.0 cm<sup>2</sup>, and then dried in air at 60°C on a hotplate. This step was repeated four times to achieve a uniform coverage of **ZSTU-1** on FTO. Electrode preparation of **ZSTU-2** and **ZSTU-3** is the same as the **ZSTU-1**.

**Photoelectrochemical measurements.** The photoelectrochemical tests were performed using an electrochemical workstation (Zahner Zennium). A three-electrode set-up, with a platinum plate (1 × 2 cm<sup>2</sup>) and an Ag/AgCl electrode as the counter and reference electrodes, respectively, was used to study the photovoltage response (illuminated open circuit potential). Meanwhile, the photocurrent test was carried out using a two-electrode set-up, in which the working electrode (**ZSTU-1**/FTO)

and the counter electrode (Pt) were short-circuited. 0.5 M Na<sub>2</sub>SO<sub>4</sub> solution (pH = 7.0) was used as the electrolyte throughout the photoelectrochemical tests. Prior to each measurement, the electrolyte was deaerated by purging it with argon continuously for 30 minutes. A 150 W tungsten halogen lamp (Filtered,  $\lambda > 400\text{nm}$ ) was used as the visible light source, and the illumination intensity on the surface of the electrode was approximately 100 mW/cm<sup>2</sup>.

**Photocatalytic experiments.** The evaluation of photocatalytic activities of the samples for the visible light photocatalytic hydrogen production was performed in a 160 mL optical reaction vessel under condensing circulating water (1 °C). First, co-catalyst platinum was plated on the catalyst by thermal reduction of glucose in 80 °C methanol maintaining 3 hours, then the sample was centrifuged and dried in a vacuum oven at 60 °C. The procedure was as follows: 50 mg of sample was dispersed into acetonitrile, triethanolamine and H<sub>2</sub>O mixed system [102 mL, V(MeCH): V(TEOA):V(H<sub>2</sub>O) = 9:1:0.2] by using TEOA as a sacrificial reagent. A 300W Xenon arc lamp coupled with a UV cut-off filter ( $\lambda > 420\text{ nm}$ ) was used as the light source. The suspension is vacuumed to ensure that the system reaches an anaerobic environment. Hydrogen gas was detected by on-line gas chromatography (Techcomp-GC7900, argon as a carrier gas) with a thermal conductivity detector.

**Transient absorption.** Femtosecond transient absorption spectra (fs-TAS) measurements were performed by using a commercial fs-TAS system, specifically, HELIOS (Ultrafast Systems). The 800 nm pulses from a Coherent Astrella regenerative amplifier (80 fs, 1 kHz, 2.5  $\mu\text{J}$  per pulse), seeded by a Coherent Vitara-s oscillator (35 fs, 80 MHz), was used to pump an optical parametric amplifier (Coherent, OperA Solo) to generate excitation pulse at 380 nm. The pump beam was chopped at 500 Hz with pump fluence at  $\sim 5\ \mu\text{J cm}^{-2}$ , while a small fraction of the 800 nm output from the Astrella was fed to a sapphire crystal in the HELIOS for generating the WLC. A 750 nm SPF was placed in the probe path before the sample to filter out the residual 800 nm in the WLC. The system has an ultimate temporal resolution of  $\sim 130\text{ fs}$ .

**Density-functional theory calculations.** Our First-principles density-functional theory (DFT) calculations were performed using the Quantum-Espresso package.<sup>[4]</sup> A semi-empirical addition of dispersive forces to conventional DFT.<sup>[5]</sup> We used Vanderbilt-type ultrasoft pseudopotentials and the generalized gradient approximation (GGA) with the Perdew-Burke-Ernzerhof (PBE) exchange

correlation. A cutoff energy of 544 eV and a  $1 \times 1 \times 2$   $k$ -point mesh (generated using the Monkhorst-Pack scheme) were found to be enough for total energy to converge within 0.01 meV/atom. The structure models of Ti-MOFs were fully optimized with respect to atomic coordinates.

## 2. Structural information.

**Table S1.** Atomic coordinates and refined unit cell parameters of **ZSTU-1**.

|                                    |               |         |         |
|------------------------------------|---------------|---------|---------|
| Name                               | <b>ZSTU-1</b> |         |         |
| Space group                        | P63/MCM       |         |         |
| a (Å)                              | 17.274(2)     |         |         |
| c (Å)                              | 11.805(2)     |         |         |
| Unit Cell Volume (Å <sup>3</sup> ) | 3057.6(8)     |         |         |
| Atom name                          | x             | y       | z       |
| C1                                 | 0.52699       | 0.31724 | 0.43219 |
| C2                                 | 0.43445       | 0.27058 | 0.43205 |
| C3                                 | 0.57298       | 0.28649 | 0.5     |
| C4                                 | 0.38841       | 0.19421 | 0.5     |
| C5                                 | 0.28976       | 0.14488 | 0.5     |
| H1                                 | 0.56492       | 0.37702 | 0.38034 |
| H2                                 | 0.39595       | 0.29118 | 0.37929 |
| H3                                 | 0.20151       | 0.0648  | 0.25    |
| N1                                 | 0.66667       | 0.33333 | 0.5     |
| O1                                 | 0.2512        | 0.17013 | 0.4298  |
| O2                                 | 0.16725       | 0.09527 | 0.25    |
| O3                                 | 0.09921       | 0.09921 | 0.57296 |
| Ti1                                | 0.11677       | 0.11677 | 0.39406 |

**Table S2.** Atomic coordinates and refined unit cell parameters of **ZSTU-2**.

|                                    |               |         |         |
|------------------------------------|---------------|---------|---------|
| Name                               | <b>ZSTU-2</b> |         |         |
| Space group                        | P63/MCM       |         |         |
| a (Å)                              | 20.1600       |         |         |
| c (Å)                              | 11.7580       |         |         |
| Unit Cell Volume (Å <sup>3</sup> ) | 4138.52       |         |         |
| Atom name                          | x             | y       | z       |
| C1                                 | 0.45935       | 0.27628 | 0.43504 |
| C2                                 | 0.37962       | 0.23613 | 0.43415 |
| C3                                 | 0.50071       | 0.25036 | 0.5     |

|     |         |         |         |
|-----|---------|---------|---------|
| C4  | 0.33894 | 0.16947 | 0.5     |
| C5  | 0.25324 | 0.12662 | 0.5     |
| C6  | 0.58557 | 0.29278 | 0.5     |
| C7  | 0.62667 | 0.37333 | 0.5     |
| H1  | 0.49067 | 0.32762 | 0.38279 |
| H2  | 0.34745 | 0.25529 | 0.38233 |
| H3  | 0.17401 | 0.05689 | 0.25    |
| H4  | 0.59539 | 0.40461 | 0.5     |
| O1  | 0.21902 | 0.14791 | 0.43062 |
| O2  | 0.14373 | 0.08207 | 0.25    |
| O3  | 0.0846  | 0.0846  | 0.57297 |
| Ti1 | 0.10312 | 0.10312 | 0.39513 |

**Table S3.** Atomic coordinates and refined unit cell parameters of **ZSTU-3**.

|                                    |               |         |         |
|------------------------------------|---------------|---------|---------|
| Name                               | <b>ZSTU-3</b> |         |         |
| Space group                        | P63/MCM       |         |         |
| a (Å)                              | 24.6300       |         |         |
| c (Å)                              | 11.7580       |         |         |
| Unit Cell Volume (Å <sup>3</sup> ) | 6177.22       |         |         |
| Atom name                          | x             | y       | z       |
| C1                                 | 0.36837       | 0.20933 | 0.41111 |
| C2                                 | 0.30354       | 0.17766 | 0.41169 |
| C3                                 | 0.56832       | 0.32392 | 0.43856 |
| C4                                 | 0.50354       | 0.29182 | 0.44037 |
| C5                                 | 0.60101       | 0.30051 | 0.5     |
| C6                                 | 0.46996       | 0.23498 | 0.5     |
| C7                                 | 0.4016        | 0.2008  | 0.5     |
| C8                                 | 0.27136       | 0.13568 | 0.5     |
| C9                                 | 0.20239       | 0.1012  | 0.5     |
| H1                                 | 0.39383       | 0.24024 | 0.34038 |
| H2                                 | 0.27657       | 0.18377 | 0.34448 |
| H3                                 | 0.59436       | 0.36777 | 0.39164 |
| H4                                 | 0.47845       | 0.31137 | 0.3955  |
| H5                                 | 0.14111       | 0.04526 | 0.25    |
| N1                                 | 0.66667       | 0.33333 | 0.5     |
| O1                                 | 0.17541       | 0.11841 | 0.42872 |
| O2                                 | 0.1168        | 0.06633 | 0.25    |
| O3                                 | 0.06949       | 0.06949 | 0.57286 |
| Ti1                                | 0.08167       | 0.08167 | 0.39379 |

### 3. Figures

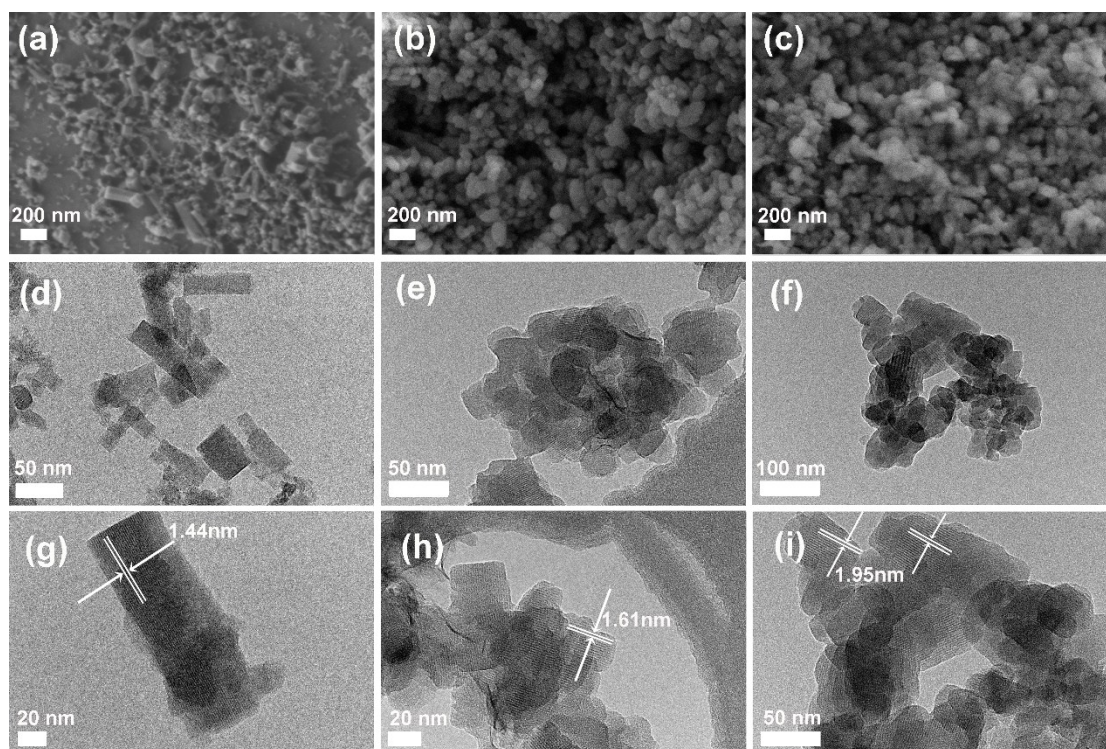

**Figure S1.** SEM of ZSTU-1 (a), ZSTU-2 (b) and ZSTU-3 (c). TEM of ZSTU-1 (d) (g), ZSTU-2 (e) (h) and ZSTU-3 (f) (i).

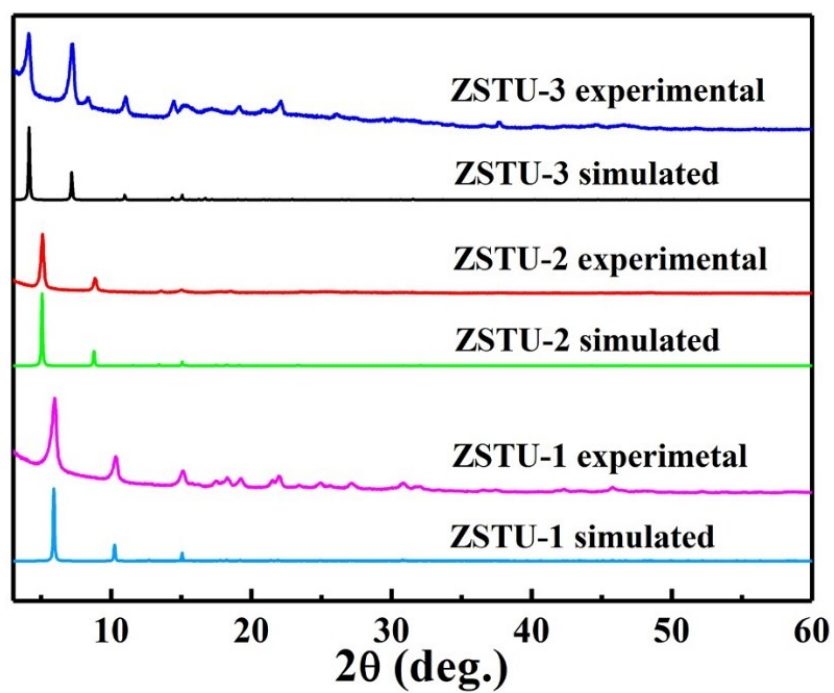

**Figure S2.** The experimental and simulated powder XRD patterns of ZSTU-1, ZSTU-2 and ZSTU-3.

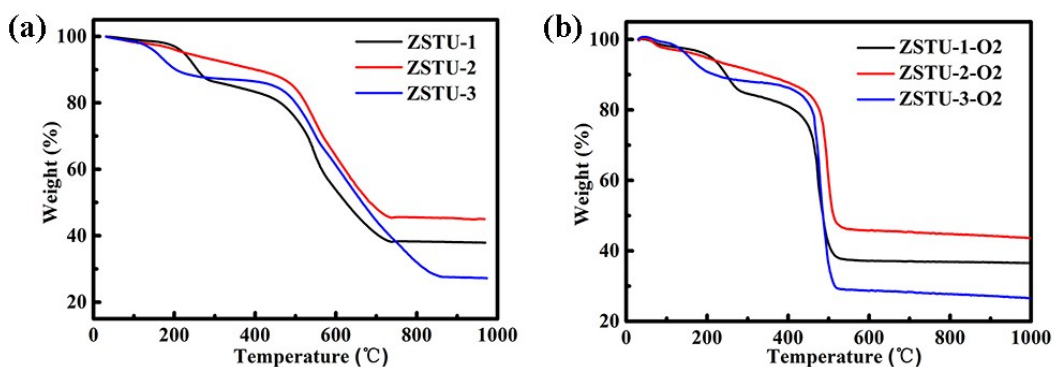

**Figure S3.** The TG curves of MOF ZSTU-1, ZSTU-2 and ZSTU-3 under N<sub>2</sub> atmosphere and air atmosphere.

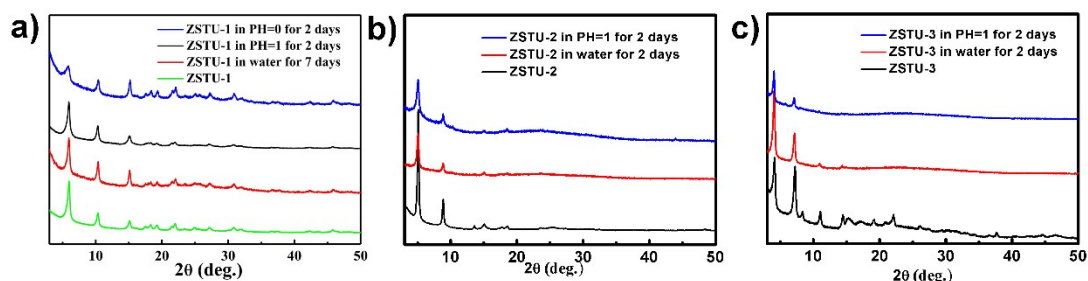

**Figure S4.** Powder XRD pattern of ZSTU-1 (a), ZSTU-2 (b) and ZSTU-3 (c) at different environments.

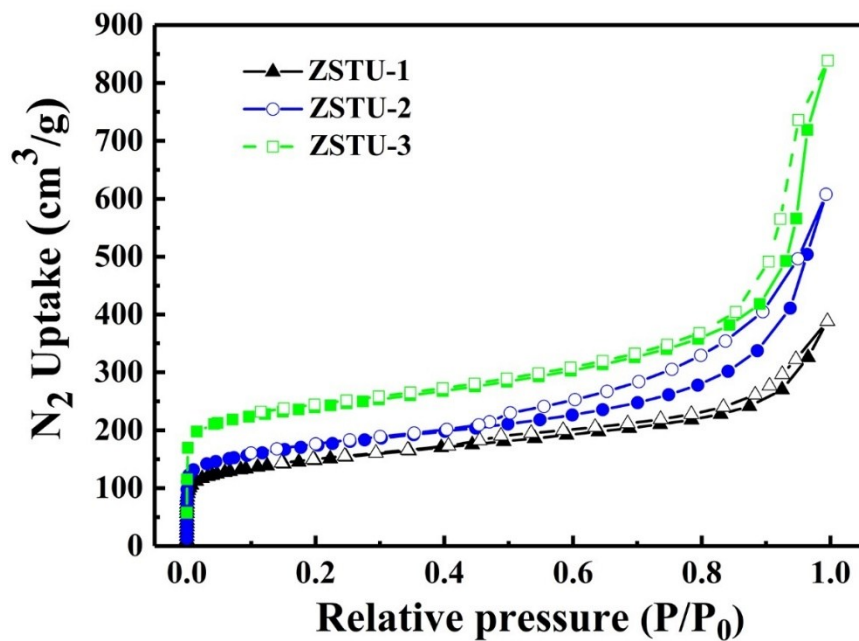

**Figure S5.** The N<sub>2</sub> adsorption isotherm of ZSTU-1, ZSTU-2 and ZSTU-3 at 77 K.



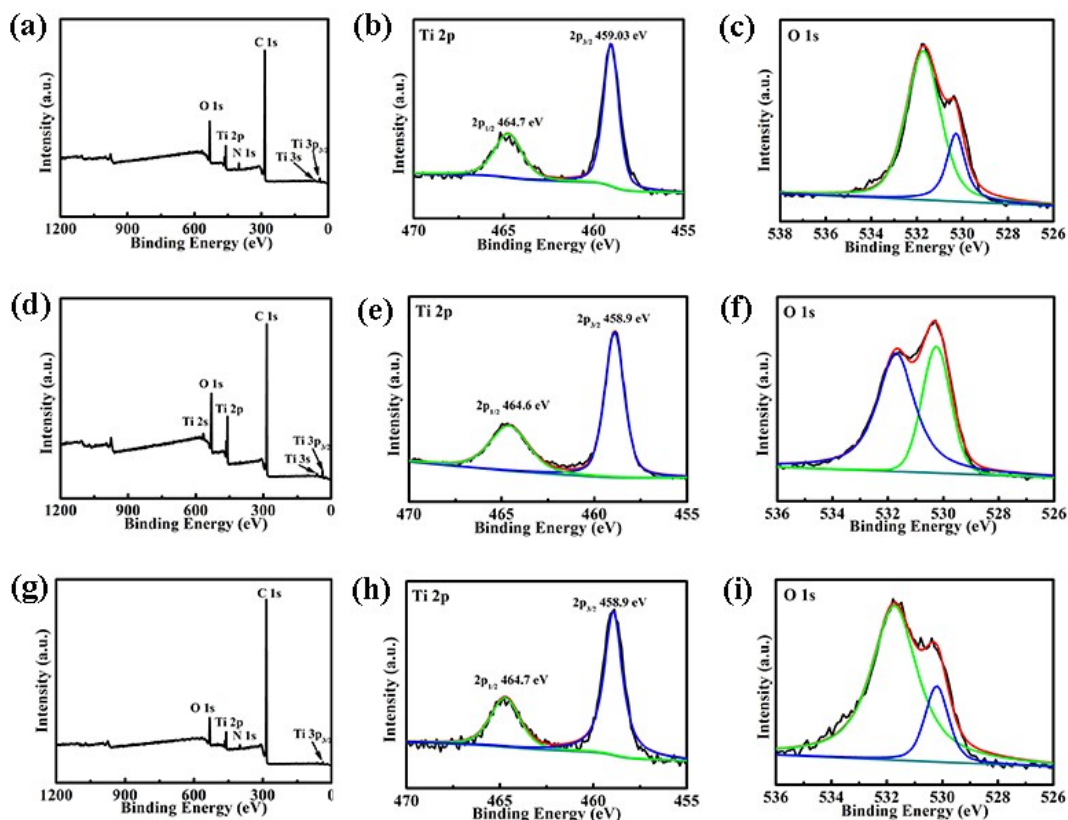

**Figure S6.** XPS pattern of **ZSTU-1** (a) (b) (c), **ZSTU-2** (d) (e) (f) and **ZSTU-3** (g) (h) (i).

The XPS survey scan spectrum indicates that **ZSTU-1** (a) and **ZSTU-3** (g) including C, N, O and Ti elements, then **ZSTU-2** (d) consists of C, O and Ti elements. About Ti element, though Figure S6 (b), (e), (h), there are two peaks located at around 464 eV and 459 eV, corresponding to Ti  $2p_{1/2}$  and Ti  $2p_{3/2}$ , respectively, suggesting a normal state of  $Ti^{4+}$ . In the high-resolution O 1s spectrum (c), (f), (i), there is a clear peak at 530.2 eV can be assigned to Ti–O–Ti, and another strong peak could be observed at 531.6 eV, corresponds to the surface hydroxyl species.

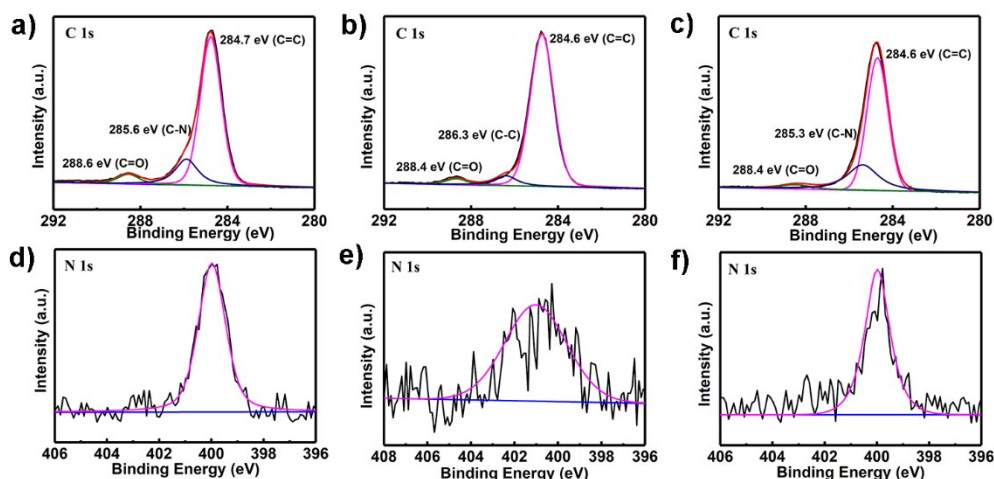

**Figure S7.** XPS pattern of **ZSTU-1** (a) (d), **ZSTU-2** (b) (e) and **ZSTU-3** (c) (f).

The XPS spectrum of the ZSTU-1 (a) and ZSTU-3 (c) in the C 1s region shows three peaks at about 284.6, 285.6 and 288.4 eV, can be assigned to C=C, C-N and C=O, respectively. Then for ZSTU-2 (b), three peaks centering at 284.5, 286.3, and 288.5 eV can be assigned to C=C, C-C and C=O, respectively. About N element, though Figure S6-2 (d) and (f), ZSTU-1 and ZSTU-3 show a clear peak at 399.6 eV can be assigned to N-(C)<sub>3</sub>. For ZSTU-2 (e), BTB without nitrogen, so there is a weak peak mainly caused by DMF.

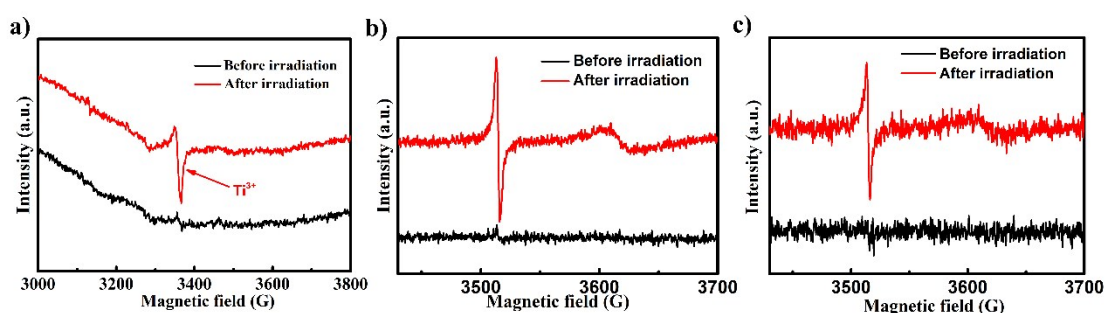

**Figure S8.** EPR spectra observed at 77 K for **ZSTU-1** (a), **ZSTU-2** (b) and **ZSTU-3** (c) immersed in CH<sub>3</sub>CN/TEOA/H<sub>2</sub>O (9:1:0.2) solution before and after visible-light irradiation ( $\lambda > 420$  nm).

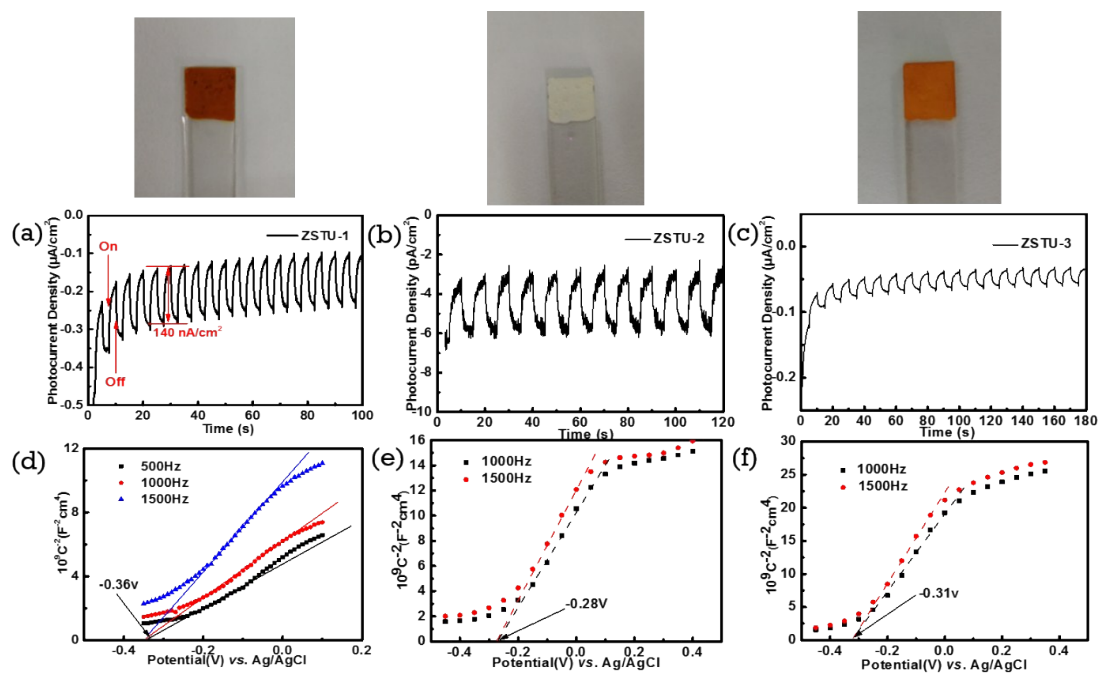

**Figure S9.** Transient photocurrent responses of ZSTU-1 (a), ZSTU-2 (b) and ZSTU-3(c), Mott-Schottky plot of the ZSTU-1 (d), ZSTU-2 (e) and ZSTU-3 (f) in 0.5 M Na<sub>2</sub>SO<sub>4</sub> solution measured at different frequency of 500, 1000 and 1500 Hz. The flat-band potential of the three samples are indicated by the intercept of the dashed lines.

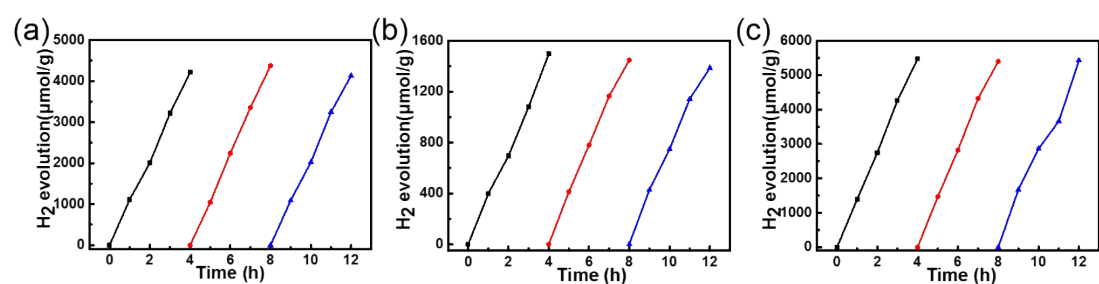

**Figure S10.** The Hydrogen production cycle of ZSTU-1, ZSTU-2 and ZSTU-3.

**Table S4.** A detailed comparison of hydrogen production performance between titanium-based MOFs and other typical photocatalytic MOFs.

| photocatalyst | Incident light                                 | Reactant solution          | H <sub>2</sub> evolution rate<br>( $\mu\text{mol h}^{-1} \text{g}^{-1}$ ) | Ref.      |
|---------------|------------------------------------------------|----------------------------|---------------------------------------------------------------------------|-----------|
| ZSTU-1        | 300 W Xe-lamp<br>$\lambda \geq 420 \text{ nm}$ | TEOA/MeCN/H <sub>2</sub> O | 1095                                                                      | This work |
| ZSTU-2        | 300 W Xe-lamp                                  | TEOA/MeCN/H <sub>2</sub> O | 374                                                                       | This work |

|                                                        |                                                                    |                            |      |           |
|--------------------------------------------------------|--------------------------------------------------------------------|----------------------------|------|-----------|
| ZSTU-3                                                 | $\lambda \geq 420$ nm<br>300 W Xe-lamp                             | TEOA/MeCN/H <sub>2</sub> O | 1368 | This work |
| PCN-416                                                | $\lambda \geq 420$ nm<br>300 W Xe-lamp                             | TEOA/MeCN/H <sub>2</sub> O | 484  | [6]       |
| PCN-415-NH <sub>2</sub>                                | $\lambda \geq 380$ nm<br>300 W Xe-lamp                             | TEOA/MeCN/H <sub>2</sub> O | 594  | [6]       |
| Pt/NH <sub>2</sub> -MIL-125                            | $\lambda \geq 380$ nm<br>300 W Xe-lamp<br>$\lambda \geq 420$ nm    | TEOA/MeCN                  | 588  | [7]       |
| C <sub>3</sub> N <sub>4</sub> /MIL-125-NH <sub>2</sub> | 300 W Xe-lamp                                                      | H <sub>2</sub> O/TEOA      | 1123 | [8]       |
| Pt@UiO-66-NH <sub>2</sub>                              | $320 \text{ nm} \leq \lambda \leq 780 \text{ nm}$<br>300 W Xe-lamp | TEOA/MeCN/H <sub>2</sub> O | 257  | [7]       |
| Ti-MOF-Ru(tpy) <sub>2</sub>                            | $\lambda \geq 380$ nm<br>300 W Xe-lamp                             | H <sub>2</sub> O/TEOA      | 181  | [9]       |
| Al-PMOF                                                | $\lambda \geq 420$ nm<br>300 W Xe-lamp                             | H <sub>2</sub> O/TEOA      | 200  | [10]      |
| MIL-100 (Fe)                                           | $\lambda \geq 420$ nm<br>300 W Xe-lamp                             | H <sub>2</sub> O/MeOH      | 109  | [11]      |
| MOF-253 (Al)                                           | $\lambda \geq 420$ nm<br>300 W Xe-lamp                             | H <sub>2</sub> O/TEOA      | 100  | [12]      |
| HM-TiPPh                                               | $\lambda \geq 420$ nm<br>300 W Xe-lamp                             | H <sub>2</sub> O/TEOA      | 945  | [13]      |
| MUV-10 (Ti-Mn)                                         | $\lambda \geq 400$ nm<br>300 W Xe-lamp<br>$\lambda \geq 420$ nm    | H <sub>2</sub> O/MeOH      | 270  | [14]      |

## References

- [1] Q. Yao, A. Bermejo Gómez, J. Su, V. Pascanu, Y. Yun, H. Zheng, H. Chen, L. Liu, H. N. Abdelhamid, B. n. Martín-Matute, *Chem. Mater.* **2015**, *27*, 5332-5339.
- [2] J. Park, D. Feng, H.-C. Zhou, *J. Am. Chem. Soc.* **2015**, *137*, 1663-1672.

- [3] Y.-P. He, Y.-X. Tan, J. Zhang, *Cryst. Growth Des.* **2012**, *13*, 6-9.
- [4] P. Giannozzi, S. Baroni, N. Bonini, M. Calandra, R. Car, C. Cavazzoni, D. Ceresoli, G. L. Chiarotti, M. Cococcioni, I. Dabo, *J. Phys.: Condens. Matter* **2009**, *21*, 395502.
- [5] V. Barone, M. Casarin, D. Forrer, M. Pavone, M. Sambi, A. Vittadini, *J. Comput. Chem.* **2009**, *30*, 934-939.
- [6] S. Yuan, J. S. Qin, H. Q. Xu, J. Su, D. Rossi, Y. P. Chen, L. L. Zhang, C. Lollar, Q. Wang, H. L. Jiang, D. H. Son, H. Y. Xu, Z. H. Huang, X. D. Zou, H. C. Zhou, *ACS Central Sci.* **2018**, *4*, 105-111.
- [7] D. Sun, W. Liu, Y. Fu, Z. Fang, F. Sun, X. Fu, Y. Zhang, Z. Li, *Chem. Eur. J.* **2014**, *20*, 4780-4788.
- [8] G. Zhou, M.-F. Wu, Q.-J. Xing, F. Li, H. Liu, X.-B. Luo, J.-P. Zou, J.-M. Luo, A.-Q. Zhang, *Appl. Catal. B: Environ.* **2018**, *220*, 607-614.
- [9] T. Toyao, M. Saito, S. Dohshi, K. Mochizuki, M. Iwata, H. Higashimura, Y. Horiuchi, M. Matsuoka, *Chem. Commun.* **2014**, *50*, 6779-6781.
- [10] A. Fateeva, P. A. Chater, C. P. Ireland, A. A. Tahir, Y. Z. Khimyak, P. V. Wiper, J. R. Darwent, M. J. Rosseinsky, *Angew. Chem. Int. Ed.* **2012**, *51*, 7440-7444.
- [11] D. Wang, Y. Song, J. Cai, L. Wu, Z. Li, *New J. Chem.* **2016**, *40*, 9170-9175.
- [12] T. Zhou, Y. Du, A. Borgna, J. Hong, Y. Wang, J. Han, W. Zhang, R. Xu, *Energy Environ. Sci.* **2013**, *6*, 3229-3234.
- [13] H. Li, Y. Sun, Z. Y. Yuan, Y. P. Zhu, T. Y. Ma, *Angew. Chem. Int. Ed.* **2018**, *57*, 3222-3227.
- [14] J. Castells-Gil, N. M. Padial, N. Almora-Barrios, J. Albero, A. R. Ruiz-Salvador, J. González-Platas, H. García, C. Martí-Gastaldo, *Angew. Chem. Int. Ed.* **2018**, *57*, 8453-8457.
